# Supplementary material
Source: MDPI journal article supplement (https://www.mdpi.com/2227-9717/12/4/844)
Supplement: s1 [file s1]

## *Supplementary Materials*

# **Pristine and UV-Weathered PET Microplastics as Water Contaminants: Appraising the Potential of the Fenton process for Effective Remediation**

**Marin Kovačić <sup>1</sup>, Antonija Tomić <sup>1</sup>, Stefani Tonković <sup>1</sup>, Anamarija Pulitika <sup>1</sup>, Josipa Papac Zjačić <sup>1</sup>, Zvonimir Katančić <sup>1</sup>, Boštjan Genorio <sup>2</sup>, Hrvoje Kušić <sup>1</sup>, Ana Lončarić Božić <sup>1,\*</sup>**

<sup>1</sup> Faculty of Chemical Engineering and Technology, University of Zagreb, Trg Marka Marulića 19, HR-10000 Zagreb, Croatia

<sup>2</sup> Faculty of Chemistry and Chemical Technology, University of Ljubljana, Večna pot 113, SI-1000 Ljubljana, Slovenia

\* Correspondence: abozic@fkit.unizg.hr

**Table S1.** Full-factorial experimental plan for the removal of pristine PET MPs (PET<sub>0</sub>) with the Fenton process:

| Exp. # | $\gamma$ (MPs), ppm | $c(\text{Fe}^{2+})$ , mM | MPs removed,<br>% |
|--------|---------------------|--------------------------|-------------------|
| 1      | 125                 | 10                       | 67.28             |
| 2      | 250                 | 10                       | 25.46             |
| 3      | 375                 | 10                       | 37.61             |
| 4      | 125                 | 25                       | 45.16             |
| 5      | 250                 | 25                       | 16.43             |
| 6      | 375                 | 25                       | 35.47             |
| 7      | 125                 | 40                       | 43.6              |
| 8      | 250                 | 40                       | 15.54             |
| 9      | 375                 | 40                       | 39.15             |

**Table S2.** Full-factorial experimental plan for the removal of PET MPs obtained from UV-weathered PET for 28 days (PET<sub>28</sub>) with the Fenton process:

| Exp. # | $\gamma$ (MPs), ppm | $c(\text{Fe}^{2+})$ , mM | MPs removed,<br>% |
|--------|---------------------|--------------------------|-------------------|
| 1      | 125                 | 10                       | 92.14             |
| 2      | 250                 | 10                       | 92.46             |
| 3      | 375                 | 10                       | 84.56             |
| 4      | 125                 | 25                       | 98.11             |
| 5      | 250                 | 25                       | 96.04             |
| 6      | 375                 | 25                       | 85.39             |
| 7      | 125                 | 40                       | 73.79             |
| 8      | 250                 | 40                       | 58.58             |
| 9      | 375                 | 40                       | 50.81             |

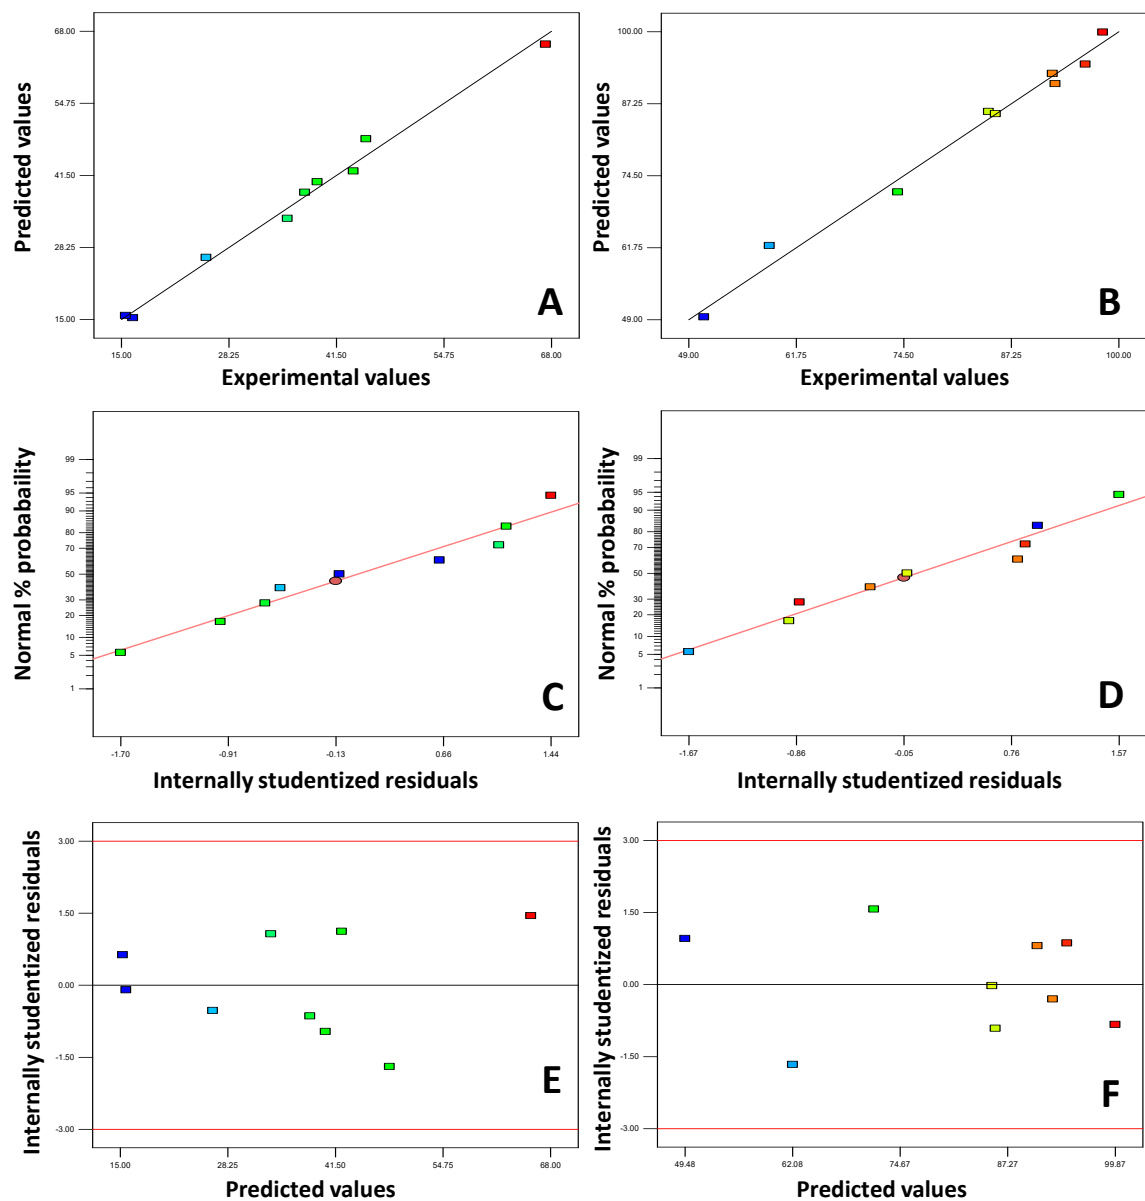

**Figure S1.** ANOVA diagnostic plots depicting the predicted vs. actual values for the normal plot of residuals for model  $Y_1$  (A), and model  $Y_2$  (B), normal plot of residuals for models  $Y_1$  (C) and  $Y_2$  (D), internally studentized residuals for model  $Y_1$  (E), and model  $Y_2$  (F).

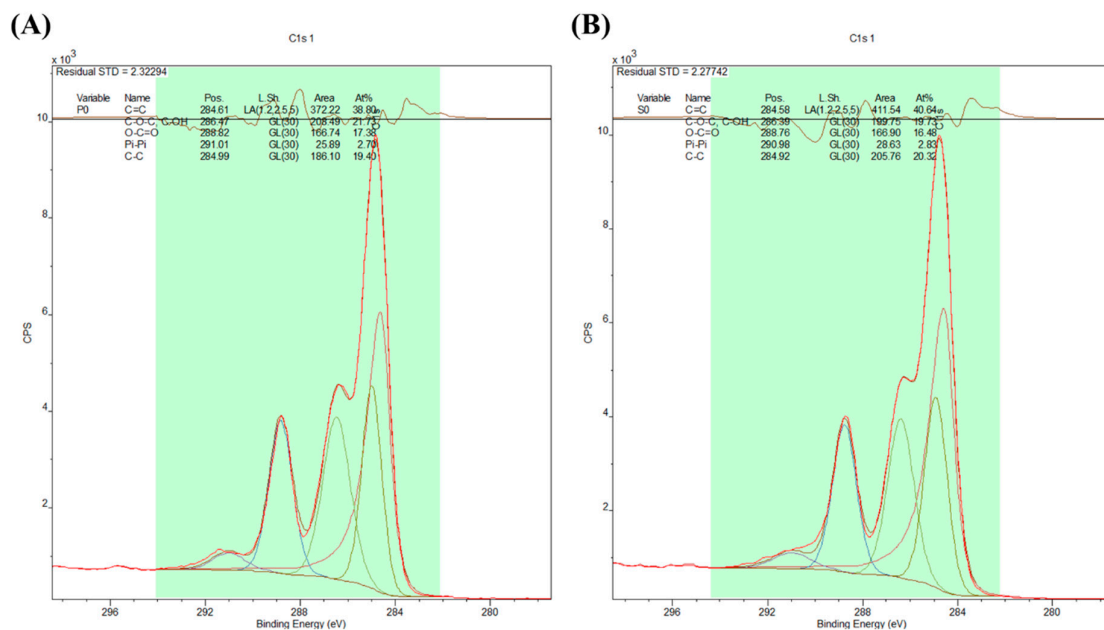

**Figure S2.** Deconvoluted XPS C 1s spectra for (A) PET<sub>0</sub> MPs, and (B) PET<sub>28</sub> MPs.

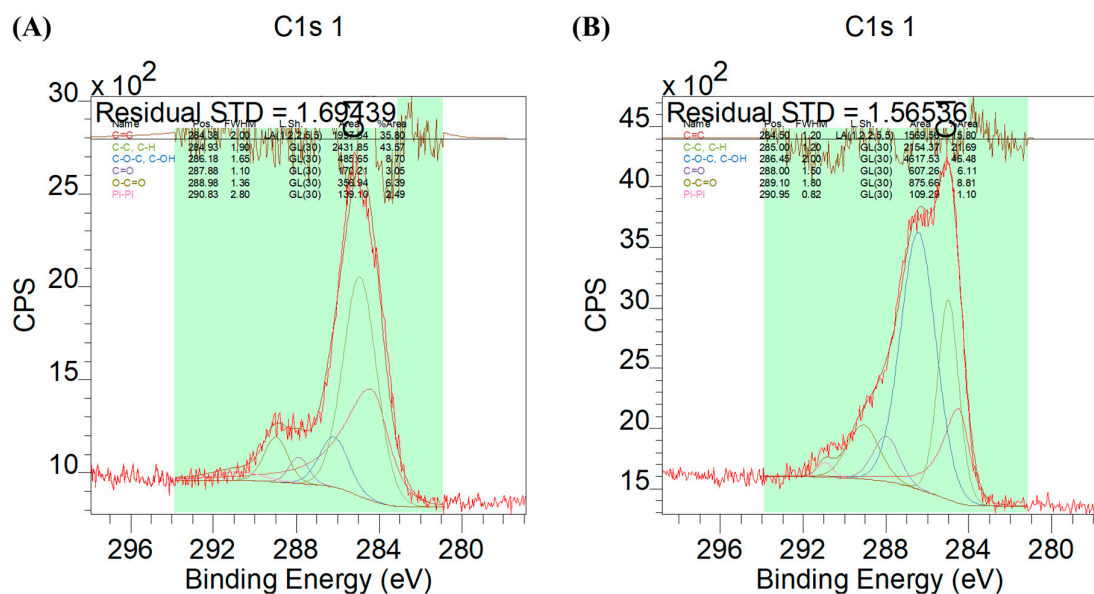

**Figure S3.** Deconvoluted XPS C 1s spectra for samples (A) PET<sub>0</sub> MPs, and (B) PET<sub>28</sub> MPs corresponding to experiment #8 in Tables S1 and S2, respectively, after the Fenton treatment.

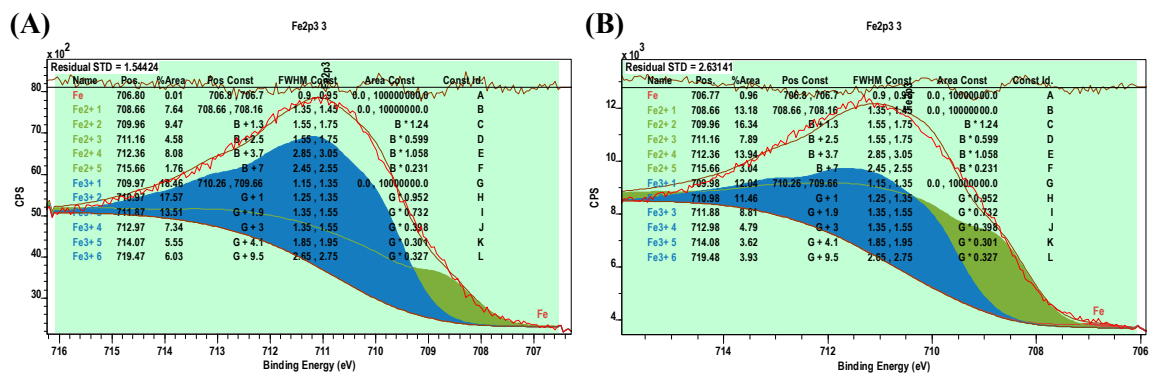

**Figure S4.** Deconvoluted XPS Fe 2p3/2 core-level spectra for samples (A) PET<sub>0</sub> MPs, and (B) PET<sub>28</sub> MPs corresponding to experiment #8 in Tables S1 and S2, respectively, after the Fenton treatment.
